# Supplementary material for: Hepatic transcriptome analyses of juvenile white bass (Morone chrysops) when fed diets where fish meal is partially or totally replaced by alternative protein sources
Source: Front Physiol. 2024 Jan 15;14:1308690. doi: 10.3389/fphys.2023.1308690 (PMC10822904; doi:10.3389/fphys.2023.1308690)
Supplement: Supplementary file 6 [file Table5.XLSX]

## Sheet: Diet 1 v Diet 5
Gene ID	Description	FC	FDR
GAZY01119816.1	gamma-synuclein isoform X1	-32.54	0.0001
GAZY01123988.1	40S ribosomal protein S19	-21.61	0
GAZY01171444.1	telomere repeats-binding bouquet formation protein 1 isoform X1	-8.42	0.0001
GAZY01144213.1	core-binding factor subunit beta isoform X1	-8.38	0
GAZY01077072.1	complement C1q-like protein 2 isoform X2	-7.99	0
GAZY01131633.1	tetraspanin-18-like isoform X2	-6.86	0
GAZY01107561.1	glial cell line-derived neurotrophic factor	-5.81	0
GAZY01121567.1	glial cell line-derived neurotrophic factor isoform X1	-5.61	0
GAZY01142129.1	C-C motif chemokine 17-like	-5.04	0.001
GAZY01172852.1	RING finger protein 157 isoform X4	-4.67	0.0004
GAZY01118419.1	apolipoprotein D-like	-4.66	0.0012
GAZY01130677.1	pancreatic lipase	-4.65	0
GAZY01162369.1	sodium/glucose cotransporter 5	-4.56	0.0007
GAZY01151892.1	putative apolipoprotein E-like	-4.4	0.0001
GAZY01167734.1	hormonally up-regulated neu tumor-associated kinase	-4.13	0
GAZY01165809.1	F-box/LRR-repeat protein 2-like isoform X1	-3.91	0.0021
GAZY01177920.1	cytoskeleton-associated protein 2-like	-3.89	0
GAZY01177898.1	G-protein coupled receptor 98	-3.88	0
GAZY01178406.1	pleckstrin homology domain-containing family A member 6 isoform X2	-3.86	0.003
GAZY01158113.1	1-phosphatidylinositol 4,5-bisphosphate phosphodiesterase eta-1 isoform X1	-3.85	0.001
GAZY01163071.1	EGF-containing fibulin-like extracellular matrix protein 1	-3.59	0
GAZY01160896.1	target of Nesh-SH3-like isoform X3	-3.57	0.0009
GAZY01133778.1	guanidinoacetate N-methyltransferase	-3.51	0
GAZY01156743.1	von Willebrand factor A domain-containing protein 1-like	-3.49	0.0025
GAZY01120272.1	deoxyribonuclease I	-3.42	0.0006
GAZY01154316.1	alpha-tectorin-like	-3.41	0
GAZY01149631.1	dual 3',5'-cyclic-AMP and -GMP phosphodiesterase 11A	-3.36	0.0007
GAZY01150618.1	regulator of G-protein signaling 7-binding protein B-like	-3.3	0.0013
GAZY01145112.1	cell surface glycoprotein CD200 receptor 1 isoform X1	-3.28	0
GAZY01156757.1	GTP-binding protein REM 2	-3.25	0.0008
GAZY01146875.1	arginase-2, mitochondrial	-3.25	0.0009
GAZY01145162.1	lysophosphatidic acid receptor 4	-3.23	0
GAZY01176733.1	thrombospondin-2 isoform X1	-3.22	0
GAZY01178365.1	excitatory amino acid transporter 2 isoform X1	-3.21	0.0005
GAZY01181967.1	tensin-like isoform X1	-3.2	0
GAZY01149623.1	class A basic helix-loop-helix protein 15	-3.11	0.0008
GAZY01165820.1	progestin and adipoQ receptor family member 9	-3.04	0
GAZY01135154.1	Carboxypeptidase B	-3.04	0.0002
GAZY01149250.1	fibroblast growth factor receptor 4-like	-3.04	0.0047
GAZY01119851.1	zinc finger and BTB domain-containing protein 22-like	-3.02	0.0012
GAZY01168346.1	coiled-coil domain-containing protein 180 isoform X1	-2.99	0
GAZY01154077.1	protein NOV homolog	-2.97	0.0038
GAZY01141827.1	actin-binding Rho-activating protein-like	-2.94	0.0024
GAZY01179769.1	collagen alpha-1(XVI) chain isoform X1	-2.93	0.0006
GAZY01161259.1	reticulon-1 isoform X1	-2.91	0.0014
GAZY01149668.1	Carbonic anhydrase 1	-2.86	0
GAZY01144483.1	programmed cell death 1 ligand 2-like	-2.84	0
GAZY01141350.1	Krueppel-like factor 10	-2.84	0
GAZY01177598.1	chloride channel protein 2-like isoform X1	-2.83	0.0029
GAZY01159346.1	transmembrane protein 116-like	-2.78	0.0047
GAZY01148236.1	acyl-CoA synthetase family member 2, mitochondrial	-2.77	0
GAZY01164862.1	adenylate cyclase type 9	-2.77	0.0005
GAZY01124443.1	ATP-binding cassette sub-family D member 2	-2.77	0.0006
GAZY01140079.1	dual specificity mitogen-activated protein kinase kinase 6	-2.74	0.0007
GAZY01145357.1	fibroblast growth factor receptor 4	-2.71	0.0024
GAZY01137182.1	matrix Gla protein	-2.67	0.0001
GAZY01183564.1	low-density lipoprotein receptor-related protein 2	-2.67	0.0008
GAZY01142406.1	stonustoxin subunit beta-like	-2.59	0.0005
GAZY01141122.1	solute carrier family 35 member D3	-2.57	0.0001
GAZY01134194.1	exopolyphosphatase PRUNE1-like	-2.57	0
GAZY01136075.1	protein disulfide-isomerase-like	-2.55	0.0017
GAZY01143911.1	HORMA domain-containing protein 1-like isoform X1	-2.53	0.0009
GAZY01179504.1	PHD finger protein 20 isoform X1	-2.51	0.0057
GAZY01147561.1	protein DDI1 homolog 2 isoform X1	-2.5	0.0002
GAZY01175190.1	alpha-N-acetylgalactosaminide alpha-2,6-sialyltransferase 1-like	-2.5	0.0021
GAZY01151013.1	2-oxoglutarate dehydrogenase-like, mitochondrial	-2.46	0.0017
GAZY01148028.1	polycystic kidney disease protein 1-like 1	-2.46	0.0053
GAZY01175611.1	membrane-associated guanylate kinase, WW and PDZ domain-containing protein 1 isoform X3	-2.45	0.0001
GAZY01133129.1	polyadenylate-binding protein 4	-2.43	0
GAZY01158145.1	G/T mismatch-specific thymine DNA glycosylase-like isoform X1	-2.42	0.0056
GAZY01149861.1	atypical kinase COQ8A, mitochondrial-like	-2.42	0
GAZY01154244.1	6-phosphofructo-2-kinase/fructose-2,6-bisphosphatase 4-like isoform X3	-2.41	0.0007
GAZY01164922.1	armadillo repeat-containing protein 2	-2.4	0.0001
GAZY01158265.1	rho guanine nucleotide exchange factor 9 isoform X2	-2.39	0.0009
GAZY01120822.1	protein yippee-like 1	-2.38	0.0038
GAZY01148031.1	tumor necrosis factor ligand superfamily member 12	-2.35	0
GAZY01116026.1	elastase-1-like	-2.34	0.0019
GAZY01126615.1	nesprin-2-like	-2.34	0.0034
GAZY01164974.1	podocan	-2.32	0.0017
GAZY01135241.1	2-acylglycerol O-acyltransferase 2	-2.31	0.0044
GAZY01134339.1	Polycystic kidney disease protein 1-like 1	-2.27	0.0004
GAZY01166639.1	E3 ubiquitin-protein ligase TRIM11-like	-2.27	0
GAZY01150502.1	TGF-beta receptor type-1-like	-2.26	0
GAZY01106729.1	protein FAM117A isoform X1	-2.26	0.0007
GAZY01113395.1	bcl-2-modifying factor-like	-2.26	0
GAZY01140923.1	4-hydroxyphenylpyruvate dioxygenase-like protein	-2.25	0.0002
GAZY01131113.1	G protein-coupled receptor kinase 5-like	-2.25	0.0001
GAZY01130966.1	zinc finger CCHC domain-containing protein 14 isoform X1	-2.25	0.0001
GAZY01113216.1	GSK-3-binding protein-like	-2.23	0.0001
GAZY01114144.1	trypsin-2 isoform X4	-2.22	0.001
GAZY01160953.1	sialin-like	-2.22	0.0009
GAZY01139636.1	KICSTOR complex protein SZT2 isoform X4	-2.22	0.0055
GAZY01172256.1	serine/threonine-protein phosphatase 2A regulatory subunit B'' subunit beta-like isoform X1	-2.21	0.0002
GAZY01135928.1	E3 ubiquitin-protein ligase TRIM63-like	-2.2	0.001
GAZY01128937.1	ubiquitin carboxyl-terminal hydrolase 22-like	-2.19	0.0051
GAZY01181785.1	KN motif and ankyrin repeat domain-containing protein 4	-2.18	0.0001
GAZY01154950.1	prelamin-A/C-like, partial	-2.17	0.001
GAZY01157881.1	low-density lipoprotein receptor-related protein 11	-2.17	0
GAZY01181166.1	slit homolog 3 protein-like	-2.15	0
GAZY01136562.1	ADP-ribosylation factor-like protein 16 isoform X1	-2.13	0.0051
GAZY01148516.1	transcription intermediary factor 1-alpha-like	-2.12	0.0028
GAZY01178946.1	chromodomain-helicase-DNA-binding protein 2 isoform X1	-2.12	0
GAZY01164791.1	myelin-oligodendrocyte glycoprotein-like isoform X2	-2.1	0
GAZY01140033.1	alpha-2-HS-glycoprotein-like	-2.1	0
GAZY01144194.1	neural proliferation differentiation and control protein 1-like	-2.1	0.0006
GAZY01158884.1	paralemmin-2-like isoform X3	-2.09	0.0001
GAZY01133258.1	dihydrofolate reductase-like	-2.09	0.0046
GAZY01148910.1	testis development-related protein	-2.09	0.0004
GAZY01167096.1	ribosomal RNA processing protein 36 homolog	-2.09	0.0001
GAZY01144204.1	E3 ubiquitin-protein ligase znrf2-like	-2.08	0
GAZY01162206.1	dimethylglycine dehydrogenase, mitochondrial	-2.07	0.0009
GAZY01179694.1	peptidyl-prolyl cis-trans isomerase FKBP11	-2.07	0
GAZY01167564.1	growth factor receptor-bound protein 10-like isoform X1	-2.06	0
GAZY01178685.1	serine/arginine-rich splicing factor 11-like isoform X2	-2.06	0
GAZY01121167.1	homeobox protein cut-like 2 isoform X1	-2.04	0.0049
GAZY01102018.1	Frizzled-8	-2.04	0
GAZY01166105.1	serine/threonine-protein kinase 36	-2.04	0.0012
GAZY01118249.1	pentraxin-related protein PTX3	-2.04	0.0043
GAZY01157254.1	serine/threonine-protein phosphatase 2A regulatory subunit B'' subunit alpha isoform X1	-2.01	0.004
GAZY01140677.1	sulfhydryl oxidase 2	-2.01	0.0008
GAZY01171803.1	ataxin-1	-2	0.0039
GAZY01155083.1	caveolin-1	-2	0.0002
GAZY01166722.1	claudin-14	-1.99	0
GAZY01172709.1	starch-binding domain-containing protein 1	-1.97	0
GAZY01123099.1	dual specificity protein phosphatase 7	-1.97	0.0011
GAZY01179597.1	alpha-N-acetylneuraminide alpha-2,8-sialyltransferase	-1.97	0.0045
GAZY01131586.1	N-acyl-aromatic-L-amino acid amidohydrolase (carboxylate-forming) B-like	-1.96	0.006
GAZY01178539.1	phosphatidate phosphatase LPIN1-like isoform X1	-1.96	0.0007
GAZY01150376.1	protein phosphatase 1 regulatory subunit 3C	-1.96	0
GAZY01178174.1	bcl-2-like protein 11 isoform X1	-1.95	0
GAZY01146676.1	acyl-CoA dehydrogenase family member 11-like	-1.95	0
GAZY01117639.1	calnexin-like	-1.94	0.0002
GAZY01158038.1	non-canonical poly(A) RNA polymerase PAPD7 isoform X1	-1.94	0.0007
GAZY01126911.1	frizzled-8	-1.94	0
GAZY01133439.1	cryptochrome-1-like	-1.92	0
GAZY01169485.1	leucine zipper putative tumor suppressor 2	-1.92	0
GAZY01157968.1	mothers against decapentaplegic homolog 3	-1.91	0
GAZY01145287.1	carboxypeptidase N subunit 2-like	-1.9	0.0014
GAZY01151177.1	netrin receptor UNC5C isoform X1	-1.9	0.0062
GAZY01115971.1	TSC22 domain family protein 1-like isoform X2	-1.9	0.0002
GAZY01169001.1	calcium-dependent secretion activator 2 isoform X2	-1.9	0.0015
GAZY01137365.1	calcium/calmodulin-dependent protein kinase type II subunit gamma isoform X2	-1.89	0.0007
GAZY01160563.1	centrosomal protein of 112 kDa isoform X1	-1.88	0.0003
GAZY01182751.1	beta/gamma crystallin domain-containing protein 1-like	-1.88	0
GAZY01161649.1	protein Hook homolog 1	-1.88	0.0007
GAZY01163074.1	corticosteroid 11-beta-dehydrogenase isozyme 2	-1.88	0.0001
GAZY01145445.1	zinc finger protein OZF-like isoform X1	-1.87	0.0007
GAZY01154581.1	growth arrest-specific protein 1-like	-1.87	0
GAZY01178767.1	gem-associated protein 4	-1.87	0
GAZY01128540.1	thyroid hormone receptor beta	-1.87	0.0002
GAZY01137114.1	Transcription factor SOX-17	-1.86	0.006
GAZY01175769.1	SH3 domain-containing YSC84-like protein 1	-1.85	0.0042
GAZY01098004.1	cAMP-specific 3',5'-cyclic phosphodiesterase 4B-like	-1.85	0.0001
GAZY01148153.1	insulin-like growth factor II	-1.84	0.0004
GAZY01122341.1	Cadherin-related family member 5	-1.84	0.005
GAZY01171476.1	T-lymphoma invasion and metastasis-inducing protein 2-like isoform X1	-1.84	0
GAZY01161507.1	mothers against decapentaplegic homolog 3 isoform X2	-1.83	0
GAZY01146072.1	amyloid-beta A4 precursor protein-binding family B member 2 isoform X1	-1.83	0.0017
GAZY01181862.1	arf-GAP with Rho-GAP domain, ANK repeat and PH domain-containing protein 2	-1.82	0.0002
GAZY01153149.1	inositol 1,4,5-trisphosphate receptor-interacting protein	-1.82	0.0052
GAZY01140653.1	dnaJ homolog subfamily C member 12	-1.82	0
GAZY01144287.1	adenosine monophosphate-protein transferase FICD	-1.82	0.001
GAZY01144251.1	lipase member H-like	-1.82	0.0002
GAZY01173242.1	centriolin-like isoform X1	-1.8	0
GAZY01150593.1	E3 ubiquitin-protein ligase UHRF2	-1.8	0
GAZY01179354.1	A disintegrin and metalloproteinase with thrombospondin motifs 17	-1.8	0.0026
GAZY01111546.1	protein Wnt-9a	-1.8	0.0047
GAZY01156857.1	modulator of retrovirus infection homolog	-1.79	0
GAZY01144249.1	rab-like protein 2A	-1.79	0.0001
GAZY01156793.1	activin receptor type-2B-like	-1.78	0
GAZY01113585.1	arfaptin-1-like	-1.78	0.0048
GAZY01140023.1	IQ calmodulin-binding motif-containing protein 1	-1.77	0.0006
GAZY01166143.1	unconventional myosin-X	-1.77	0
GAZY01139339.1	protein disulfide-isomerase	-1.77	0
GAZY01103974.1	E3 ubiquitin-protein ligase RNF34-like isoform X3	-1.77	0.0028
GAZY01148618.1	zinc finger protein 2 homolog isoform X2	-1.76	0.0013
GAZY01140449.1	DENN domain-containing protein 1B isoform X2	-1.76	0.0032
GAZY01119340.1	tryptase-2-like	-1.76	0.0009
GAZY01129098.1	cytoplasmic polyadenylation element-binding protein 3 isoform X5	-1.75	0.0026
GAZY01179103.1	pleckstrin homology domain-containing family A member 6 isoform X1	-1.74	0.0006
GAZY01122503.1	protein transport protein Sec61 subunit beta	-1.74	0
GAZY01174385.1	liprin-beta-1 isoform X4	-1.72	0.0002
GAZY01178559.1	signal transducer and activator of transcription 5B-like	-1.72	0.0001
GAZY01109750.1	acyl-CoA-binding domain-containing protein 5	-1.72	0.0039
GAZY01130513.1	elongation factor 2	-1.72	0.0018
GAZY01142480.1	aminopeptidase Ey-like	-1.72	0.0018
GAZY01157394.1	zinc finger and BTB domain-containing protein 16-A-like	-1.72	0.0004
GAZY01156778.1	glutamate dehydrogenase, mitochondrial	-1.71	0
GAZY01123124.1	Death-associated protein 1	-1.71	0
GAZY01131368.1	tankyrase-1 isoform X2	-1.71	0.0005
GAZY01159693.1	ankyrin repeat domain-containing protein SOWAHB-like	-1.7	0.0026
GAZY01177080.1	protein O-GlcNAcase isoform X1	-1.7	0.0003
GAZY01177874.1	patatin-like phospholipase domain-containing protein 7	-1.7	0
GAZY01143102.1	Krueppel-like factor 11	-1.7	0.0006
GAZY01174541.1	alpha-2-macroglobulin-like isoform X1	-1.7	0.0042
GAZY01153140.1	centrosomal protein POC5	-1.69	0.006
GAZY01157662.1	fascin	-1.69	0.0008
GAZY01156251.1	solute carrier family 2, facilitated glucose transporter member 2	-1.69	0
GAZY01150973.1	bifunctional epoxide hydrolase 2	-1.69	0
GAZY01153977.1	sodium-dependent phosphate transporter 2 isoform X1	-1.69	0.0008
GAZY01171996.1	transient receptor potential cation channel subfamily M member 4-like	-1.68	0.0038
GAZY01179629.1	BCLAF1 and THRAP3 family member 3	-1.68	0
GAZY01149353.1	homeobox protein Hox-B3a	-1.68	0.0048
GAZY01136132.1	misshapen-like kinase 1 isoform X3	-1.68	0.0023
GAZY01152132.1	platelet endothelial cell adhesion molecule-like	-1.68	0.0001
GAZY01165612.1	carnitine O-acetyltransferase-like	-1.67	0.0001
GAZY01117424.1	saxitoxin and tetrodotoxin-binding protein 1-like	-1.67	0.006
GAZY01152212.1	T-box transcription factor TBX19	-1.67	0.0001
GAZY01155195.1	netrin-4	-1.67	0.0005
GAZY01171898.1	probable ATP-dependent RNA helicase DDX17	-1.67	0
GAZY01137363.1	protein shisa-4	-1.67	0.0013
GAZY01123434.1	membrane-associated guanylate kinase, WW and PDZ domain-containing protein 1-like	-1.67	0.0046
GAZY01177549.1	TOG array regulator of axonemal microtubules protein 1	-1.67	0.0001
GAZY01089876.1	protein FAM126B isoform X1	-1.66	0.0038
GAZY01160603.1	integrator complex subunit 6-like	-1.66	0.001
GAZY01120526.1	syntaxin-1A-like isoform X2	-1.66	0.002
GAZY01112078.1	matrin-3	-1.65	0
GAZY01176796.1	partitioning defective 3 homolog B isoform X1	-1.65	0.0033
GAZY01151649.1	keratin, type I cytoskeletal 9-like	-1.65	0.0001
GAZY01163259.1	bromodomain adjacent to zinc finger domain protein 2B isoform X6	-1.65	0.0016
GAZY01134987.1	secreted phosphoprotein 24	-1.65	0
GAZY01137920.1	protein c-ets-1-B-like isoform X2	-1.65	0.0054
GAZY01116085.1	protein shisa-9B-like	-1.65	0.0002
GAZY01166805.1	RNA-binding motif protein, X chromosome isoform X1	-1.65	0
GAZY01182132.1	von Willebrand factor	-1.65	0.001
GAZY01163386.1	insulin receptor substrate 2-like isoform X2	-1.64	0.0013
GAZY01179719.1	zinc finger homeobox protein 2 isoform X2	-1.64	0.0007
GAZY01150706.1	LIM domain-containing protein ajuba	-1.64	0.0006
GAZY01162532.1	MAX gene-associated protein-like isoform X5	-1.64	0.0022
GAZY01177154.1	unconventional myosin-X-like	-1.64	0
GAZY01176636.1	delphilin isoform X1	-1.63	0.0001
GAZY01167337.1	smoothelin-like isoform X2	-1.63	0.0041
GAZY01153815.1	ephrin type-B receptor 1-B isoform X1	-1.63	0.0016
GAZY01161236.1	band 4.1-like protein 3 isoform X1	-1.63	0
GAZY01172115.1	F-actin-monooxygenase MICAL2 isoform X4	-1.63	0.0016
GAZY01156553.1	protein FAM83C	-1.63	0
GAZY01153310.1	transmembrane and coiled-coil domain protein 3 isoform X2	-1.63	0.0001
GAZY01133234.1	annexin A1	-1.62	0.0002
GAZY01115222.1	protein phosphatase 1 regulatory subunit 3G	-1.62	0.0028
GAZY01175574.1	alpha-mannosidase 2-like	-1.62	0
GAZY01167334.1	prickle-like protein 2 isoform X2	-1.61	0.0045
GAZY01181025.1	probable JmjC domain-containing histone demethylation protein 2C isoform X1	-1.61	0
GAZY01131689.1	transcription cofactor vestigial-like protein 4 isoform X2	-1.61	0.0046
GAZY01171677.1	ral guanine nucleotide dissociation stimulator-like 1 isoform X1	-1.61	0.001
GAZY01161096.1	oxidation resistance protein 1 isoform X3	-1.61	0.0005
GAZY01124708.1	translocon-associated protein subunit delta	-1.61	0
GAZY01131672.1	protein FAM126B isoform X2	-1.6	0.0011
GAZY01159344.1	inaD-like protein isoform X5	-1.6	0
GAZY01155098.1	gastrula zinc finger protein XlCGF58.1-like isoform X1	-1.6	0.0002
GAZY01159453.1	5'(3')-deoxyribonucleotidase, mitochondrial	-1.6	0.0004
GAZY01183469.1	E3 ubiquitin-protein ligase MYCBP2 isoform X7	-1.6	0.001
GAZY01149126.1	methionine--tRNA ligase, mitochondrial	-1.6	0.0049
GAZY01146235.1	solute carrier family 35 member B1	-1.6	0.0045
GAZY01177664.1	plexin-A2-like	-1.6	0.0004
GAZY01094966.1	ATP synthase F(0) complex subunit C3, mitochondrial-like	-1.59	0.0011
GAZY01164873.1	protein FAM173B-like	-1.59	0.0024
GAZY01172888.1	A disintegrin and metalloproteinase with thrombospondin motifs 2-like	-1.59	0
GAZY01168169.1	inaD-like protein isoform X1	-1.59	0.0008
GAZY01160040.1	signal recognition particle 54 kDa protein	-1.59	0.0033
GAZY01151781.1	serine/threonine-protein phosphatase 6 regulatory ankyrin repeat subunit B isoform X2	-1.59	0.0037
GAZY01182166.1	msx2-interacting protein	-1.59	0.0018
GAZY01144677.1	glycerol-3-phosphate acyltransferase 3-like	-1.59	0.0008
GAZY01167395.1	choline dehydrogenase, mitochondrial	-1.59	0
GAZY01148498.1	zinc finger CCCH domain-containing protein 3	-1.58	0.0017
GAZY01164468.1	clustered mitochondria protein homolog	-1.58	0.0022
GAZY01143756.1	inositol hexakisphosphate kinase 1	-1.58	0.0042
GAZY01181036.1	pleckstrin homology domain-containing family G member 3 isoform X1	-1.58	0.0004
GAZY01168922.1	oxidation resistance protein 1 isoform X1	-1.57	0.0006
GAZY01146425.1	ceramide-1-phosphate transfer protein-like	-1.57	0.0005
GAZY01172237.1	sodium bicarbonate cotransporter 3-like isoform X1	-1.57	0.0002
GAZY01138113.1	bile salt export pump-like	-1.56	0.0001
GAZY01175063.1	zinc finger MYND domain-containing protein 11 isoform X1	-1.56	0
GAZY01169572.1	CST complex subunit CTC1	-1.56	0.0002
GAZY01143523.1	hydroxyacid oxidase 2 isoform X2	-1.56	0.0006
GAZY01132430.1	rho GTPase-activating protein 29 isoform X1	-1.56	0.0008
GAZY01180537.1	microtubule-associated protein 1S-like	-1.56	0.001
GAZY01160037.1	histone-lysine N-methyltransferase 2C-like isoform X2	-1.56	0.0001
GAZY01178814.1	phosphorylase b kinase regulatory subunit alpha, skeletal muscle isoform isoform X1	-1.55	0
GAZY01131812.1	striatin-like isoform X2	-1.55	0.0013
GAZY01166096.1	para-nitrobenzyl esterase-like	-1.54	0
GAZY01146884.1	endoribonuclease LACTB2	-1.54	0
GAZY01181412.1	tyrosine-protein kinase STYK1-like	-1.54	0.0017
GAZY01179003.1	inactive phospholipase C-like protein 2	-1.54	0.0024
GAZY01181743.1	liprin-alpha-1 isoform X7	-1.53	0.0005
GAZY01143400.1	aldehyde dehydrogenase family 9 member A1	-1.53	0.0005
GAZY01153751.1	E3 ubiquitin-protein ligase TRIM13 isoform X1	-1.53	0.0028
GAZY01177907.1	pleckstrin homology domain-containing family A member 6 isoform X3	-1.53	0.0058
GAZY01157182.1	serine/threonine-protein kinase ULK1-like isoform X1	-1.53	0.0011
GAZY01178185.1	neuropilin-1 isoform X1	-1.53	0.0033
GAZY01152873.1	cathepsin S	-1.53	0.0004
GAZY01155990.1	DDB1- and CUL4-associated factor 11	-1.52	0.0006
GAZY01078329.1	ubiquitin-60S ribosomal protein L40 isoform X2	-1.52	0.0059
GAZY01155509.1	transcription factor MafB	-1.52	0.0001
GAZY01176912.1	rho GTPase-activating protein 27-like isoform X1	-1.52	0.0005
GAZY01161110.1	cohesin subunit SA-1	-1.52	0.0033
GAZY01165786.1	zinc finger and SCAN domain-containing protein 2-like	-1.52	0.001
GAZY01177870.1	transport and Golgi organization protein 1 homolog isoform X1	-1.52	0.0006
GAZY01179992.1	transmembrane protein 245 isoform X2	-1.52	0.0049
GAZY01156871.1	tetratricopeptide repeat protein 14 isoform X1	-1.51	0
GAZY01155127.1	NEDD4-binding protein 3 homolog	-1.51	0.0022
GAZY01179141.1	DNA polymerase zeta catalytic subunit	-1.51	0.0004
GAZY01113709.1	protein SDE2 homolog isoform X2	-1.51	0.006
GAZY01123858.1	1-phosphatidylinositol 4,5-bisphosphate phosphodiesterase delta-3	-1.51	0.0058
GAZY01158012.1	solute carrier family 22 member 23-like	-1.51	0.0032
GAZY01158370.1	STIP1 homology and U box-containing protein 1-like	-1.51	0.0029
GAZY01155586.1	pinin	-1.51	0.0025
GAZY01176397.1	oxidation resistance protein 1 isoform X2	-1.5	0.0008
GAZY01158136.1	myosin light chain kinase, smooth muscle isoform X1	-1.5	0.0001
GAZY01172121.1	protein ELYS isoform X1	-1.5	0.0001
GAZY01132406.1	axin-1-like	-1.5	0.0035
GAZY01172976.1	zinc finger protein 106	-1.5	0.0032
GAZY01130790.1	galectin-9-like	1.5	0.0042
GAZY01168123.1	N-lysine methyltransferase SMYD2-A-like	1.5	0.0037
GAZY01114862.1	catechol O-methyltransferase domain-containing protein 1-like	1.5	0
GAZY01139151.1	tRNA pseudouridine synthase A	1.51	0.0039
GAZY01172117.1	nucleolar complex protein 2 homolog	1.51	0
GAZY01156900.1	ataxin-10	1.51	0.0044
GAZY01177108.1	protein FAM49A isoform X2	1.52	0.0013
GAZY01143673.1	2-(3-amino-3-carboxypropyl)histidine synthase subunit 1	1.52	0
GAZY01137733.1	NEDD8-activating enzyme E1 catalytic subunit isoform X1	1.52	0.0019
GAZY01163201.1	DUF1725 domain-containing protein	1.52	0.0033
GAZY01149073.1	mitochondrial import inner membrane translocase subunit Tim8 B	1.52	0.0017
GAZY01176202.1	epidermal growth factor receptor	1.52	0.0053
GAZY01151891.1	GPI-anchor transamidase	1.52	0
GAZY01175651.1	nuclear factor erythroid 2-related factor 1 isoform X1	1.52	0.0001
GAZY01157665.1	negative elongation factor C/D	1.52	0.0009
GAZY01181803.1	regulator of nonsense transcripts 1	1.52	0.0004
GAZY01165163.1	tetraspanin-1-like	1.52	0
GAZY01176507.1	myotubularin-related protein 4 isoform X2	1.53	0.0032
GAZY01178206.1	interleukin-17 receptor C-like	1.53	0.0026
GAZY01126268.1	U6 snRNA-associated Sm-like protein LSm7	1.53	0.002
GAZY01140680.1	TAR DNA-binding protein 43 isoform X2	1.53	0.001
GAZY01111475.1	cysteine-rich PDZ-binding protein	1.53	0
GAZY01153382.1	CD276 antigen homolog isoform X1	1.53	0.0002
GAZY01120250.1	rRNA-processing protein FCF1 homolog	1.53	0.0006
GAZY01122976.1	proteasome subunit alpha type-1	1.54	0.0061
GAZY01172070.1	putative leucine-rich repeat-containing protein DDB_G0290503	1.54	0.0024
GAZY01147490.1	phospholipase D4	1.55	0
GAZY01129421.1	insulin-like growth factor-binding protein 2	1.55	0.003
GAZY01099258.1	glutathione peroxidase 1-like	1.55	0.0006
GAZY01123426.1	profilin-2-like isoform X1	1.55	0.0002
GAZY01150714.1	microtubule-associated protein RP/EB family member 2 isoform X1	1.56	0.0003
GAZY01171602.1	Importin-4	1.56	0.0014
GAZY01147343.1	Adenine phosphoribosyltransferase	1.56	0.0018
GAZY01177600.1	selenocysteine-specific elongation factor	1.57	0.0031
GAZY01147271.1	HEAT repeat-containing protein 3	1.57	0.0012
GAZY01142020.1	exosome complex component RRP45	1.57	0.0001
GAZY01155048.1	iduronate 2-sulfatase	1.57	0.0012
GAZY01120412.1	ferritin, middle subunit	1.57	0.0043
GAZY01174417.1	protein O-GlcNAcase-like	1.57	0.0015
GAZY01139898.1	phospholipid hydroperoxide glutathione peroxidase, mitochondrial-like	1.58	0.0009
GAZY01169103.1	mid1-interacting protein 1-like	1.58	0.0022
GAZY01156884.1	26S proteasome non-ATPase regulatory subunit 1	1.58	0.0055
GAZY01149189.1	SET and MYND domain-containing protein 5	1.58	0.0002
GAZY01127049.1	zinc finger protein 622	1.58	0
GAZY01164572.1	dipeptidyl peptidase 2	1.58	0
GAZY01181325.1	maestro heat-like repeat-containing protein family member 1 isoform X1	1.59	0.0003
GAZY01163393.1	gamma-tubulin complex component 3	1.59	0.0031
GAZY01176611.1	complement C4-like	1.59	0.0016
GAZY01122056.1	thiopurine S-methyltransferase isoform X1	1.59	0.0004
GAZY01141620.1	prostaglandin E synthase 3	1.59	0
GAZY01146713.1	26S proteasome non-ATPase regulatory subunit 11A	1.59	0.0013
GAZY01132657.1	glutathione S-transferase omega-1	1.59	0.0016
GAZY01130102.1	warm-temperature-acclimation-related 65-kDa protein	1.59	0
GAZY01117039.1	DNA polymerase delta subunit 4	1.59	0.0006
GAZY01154561.1	transcription elongation factor B polypeptide 3-like isoform X1	1.59	0.0045
GAZY01132116.1	DNA-binding protein SATB1-like isoform X1	1.6	0.0037
GAZY01152575.1	putative monooxygenase p33MONOX	1.6	0
GAZY01173504.1	set1/Ash2 histone methyltransferase complex subunit ASH2 isoform X1	1.6	0.0003
GAZY01144235.1	calponin-3	1.6	0
GAZY01156031.1	protein HGH1 homolog	1.6	0.0001
GAZY01170959.1	probable histone deacetylase 1-B	1.61	0.0002
GAZY01132299.1	39S ribosomal protein L48, mitochondrial	1.61	0.0003
GAZY01172100.1	forkhead box protein O1-A-like	1.61	0.0002
GAZY01110567.1	ras-related protein Rap-1b	1.61	0.0007
GAZY01110480.1	acyl-CoA-binding protein	1.62	0
GAZY01180253.1	sperm-associated antigen 1 isoform X2	1.62	0
GAZY01157032.1	probable E3 ubiquitin-protein ligase ARI5	1.63	0.0035
GAZY01133799.1	protein PAXX	1.63	0.0014
GAZY01139615.1	serine/threonine-protein kinase D3 isoform X1	1.63	0.0057
GAZY01147096.1	regulation of nuclear pre-mRNA domain-containing protein 1A	1.63	0.0007
GAZY01155247.1	phospholipid phosphatase 3 isoform X1	1.64	0.0008
GAZY01172535.1	RING finger protein 148-like	1.64	0.001
GAZY01147999.1	ras-related protein Rab-30	1.64	0.004
GAZY01111209.1	10 kDa heat shock protein, mitochondrial isoform X2	1.64	0
GAZY01152286.1	coiled-coil domain-containing protein 126	1.64	0
GAZY01162125.1	glutathione synthetase	1.64	0.0041
GAZY01162777.1	microsomal glutathione S-transferase 3	1.65	0.0007
GAZY01131530.1	transmembrane protein 82	1.65	0.0001
GAZY01155792.1	proteasome assembly chaperone 2	1.65	0
GAZY01152692.1	V-type proton ATPase catalytic subunit A	1.65	0.0005
GAZY01150773.1	oxidative stress-induced growth inhibitor 2-like	1.65	0.0039
GAZY01162068.1	oxysterol-binding protein-related protein 3 isoform X3	1.66	0.0016
GAZY01156854.1	AP-3 complex subunit mu-2	1.66	0.0002
GAZY01142458.1	H/ACA ribonucleoprotein complex subunit 2	1.67	0.0001
GAZY01136133.1	cell division control protein 42 homolog	1.67	0
GAZY01165759.1	WD repeat and HMG-box DNA-binding protein 1	1.67	0.003
GAZY01129523.1	bolA-like protein 1	1.68	0.0037
GAZY01161733.1	macrophage-expressed gene 1 protein-like	1.68	0.0008
GAZY01159676.1	heterogeneous nuclear ribonucleoprotein D0-like	1.68	0.0009
GAZY01139130.1	nicotinamide riboside kinase 2-like	1.68	0.0008
GAZY01129001.1	NACHT domain- and WD repeat-containing protein 1-like	1.68	0.0005
GAZY01152818.1	serine/threonine-protein kinase PLK2 isoform X1	1.68	0.0003
GAZY01117645.1	ribosomal RNA-processing protein 7 homolog A	1.69	0.0001
GAZY01138643.1	THUMP domain-containing protein 3	1.69	0.0025
GAZY01154377.1	caspase recruitment domain-containing protein 19-like	1.69	0.0043
GAZY01138183.1	PDZ and LIM domain protein 1	1.69	0.0007
GAZY01157660.1	ELL-associated factor 2	1.7	0.0003
GAZY01140402.1	transmembrane protein 70, mitochondrial	1.7	0.0003
GAZY01155672.1	alpha-N-acetylglucosaminidase	1.7	0
GAZY01132424.1	mitochondrial import inner membrane translocase subunit Tim10	1.71	0.0002
GAZY01176722.1	gem-associated protein 5	1.71	0.0011
GAZY01149316.1	mitochondrial import inner membrane translocase subunit TIM44-like	1.73	0.0002
GAZY01171651.1	high affinity cAMP-specific and IBMX-insensitive 3',5'-cyclic phosphodiesterase 8B isoform X1	1.73	0.0018
GAZY01178905.1	SH3 domain-binding protein 1-like	1.74	0.0029
GAZY01127840.1	LIM domain-containing protein 2	1.74	0.0037
GAZY01137166.1	28S ribosomal protein S27, mitochondrial	1.74	0.0014
GAZY01133483.1	V-type proton ATPase subunit E 1-like	1.74	0.0003
GAZY01130249.1	heme transporter hrg1-A-like	1.74	0.0001
GAZY01141383.1	trafficking protein particle complex subunit 6b	1.74	0
GAZY01158386.1	ATP-binding cassette sub-family F member 1	1.74	0.0025
GAZY01181354.1	methionine aminopeptidase 1	1.75	0.0001
GAZY01134593.1	sushi, von Willebrand factor type A, EGF and pentraxin domain-containing protein 1-like isoform X2	1.75	0.0026
GAZY01144275.1	heat shock 70 kDa protein 4-like	1.75	0.0039
GAZY01172385.1	GPI transamidase component PIG-T	1.75	0.0006
GAZY01148311.1	max-binding protein MNT isoform X1	1.75	0.0017
GAZY01178051.1	granulins isoform X1	1.75	0
GAZY01166471.1	myotubularin-related protein 2 isoform X2	1.75	0.0032
GAZY01151279.1	serine protease 23	1.76	0.0001
GAZY01142283.1	tRNA methyltransferase 10 homolog A	1.76	0.0008
GAZY01157413.1	nucleic acid dioxygenase ALKBH1	1.77	0.0011
GAZY01107029.1	LSM8 homolog, U6 small nuclear RNA associated	1.77	0.0009
GAZY01141422.1	disabled homolog 2 isoform X1	1.77	0.0023
GAZY01143212.1	SLAM family member 9-like	1.77	0.0024
GAZY01143119.1	erythropoietin isoform X1	1.78	0
GAZY01144676.1	maternal B9.15 protein-like	1.78	0.0015
GAZY01137005.1	glucosamine 6-phosphate N-acetyltransferase	1.78	0
GAZY01178494.1	microfibril-associated glycoprotein 4-like	1.78	0.0027
GAZY01097864.1	phosphatase and actin regulator 4A-like isoform X3	1.78	0.005
GAZY01144256.1	max dimerization protein 1	1.78	0.0012
GAZY01162787.1	nuclear receptor subfamily 1 group D member 1-like	1.78	0.0003
GAZY01110389.1	profilin-1-like	1.79	0.0009
GAZY01178745.1	telomerase reverse transcriptase	1.79	0.004
GAZY01153458.1	nuclear pore complex protein Nup93 isoform X1	1.79	0
GAZY01162268.1	interleukin-6 receptor subunit beta-like	1.8	0
GAZY01133336.1	sphingomyelin synthase-related protein 1-like	1.8	0
GAZY01161412.1	fatty acyl-CoA hydrolase precursor, medium chain-like	1.8	0.0002
GAZY01141193.1	cytochrome c oxidase protein 20 homolog	1.8	0
GAZY01146912.1	tRNA (adenine(58)-N(1))-methyltransferase catalytic subunit TRMT61A	1.8	0
GAZY01125909.1	high affinity cAMP-specific and IBMX-insensitive 3',5'-cyclic phosphodiesterase 8A isoform X1	1.81	0.0007
GAZY01125349.1	fat storage-inducing transmembrane protein 2	1.81	0.0047
GAZY01154713.1	NSFL1 cofactor p47 isoform X1	1.81	0.0002
GAZY01133895.1	nucleoporin Nup43	1.82	0.0009
GAZY01172426.1	toll-like receptor 8	1.82	0.005
GAZY01172466.1	folate transporter 1	1.82	0
GAZY01154288.1	thymic stromal cotransporter homolog	1.83	0.0022
GAZY01148517.1	prolyl endopeptidase	1.84	0.0022
GAZY01176770.1	apoptotic protease-activating factor 1	1.84	0.0006
GAZY01137974.1	metaxin-2	1.84	0.0018
GAZY01123819.1	D(4) dopamine receptor	1.84	0.0007
GAZY01117925.1	probable ergosterol biosynthetic protein 28	1.84	0.0039
GAZY01112023.1	DNA-directed RNA polymerase I subunit RPA12	1.84	0.0002
GAZY01169038.1	arf-GAP with dual PH domain-containing protein 1-like	1.84	0.0023
GAZY01156823.1	cytoplasmic phosphatidylinositol transfer protein 1-like	1.85	0.0002
GAZY01109256.1	apolipoprotein C-I-like	1.85	0.0025
GAZY01150919.1	putative leucine-rich repeat-containing protein DDB_G0290503 isoform X1	1.86	0.0001
GAZY01110929.1	cystatin-B-like	1.87	0.0001
GAZY01130096.1	nucleoporin Nup37	1.87	0.0002
GAZY01122995.1	protein MAK16 homolog	1.87	0.0031
GAZY01177909.1	coiled-coil domain-containing protein 172	1.87	0.0059
GAZY01139522.1	NEDD4-binding protein 2-like 2	1.87	0.0017
GAZY01127811.1	cytochrome b-245 light chain	1.88	0.0003
GAZY01170487.1	N-acetylglutamate synthase, mitochondrial	1.88	0.0035
GAZY01132854.1	ADP-ribosylation factor-binding protein GGA3	1.89	0.0051
GAZY01137402.1	mitochondrial import inner membrane translocase subunit Tim13	1.89	0.0003
GAZY01177148.1	MAGUK p55 subfamily member 6-like isoform X1	1.89	0.0005
GAZY01160942.1	FYN-binding protein 2 isoform X1	1.89	0.0001
GAZY01140447.1	bridging integrator 2-like isoform X2	1.9	0.0024
GAZY01147835.1	Down syndrome cell adhesion molecule homolog	1.9	0.0008
GAZY01142297.1	NADH-cytochrome b5 reductase 2-like	1.9	0.0026
GAZY01178100.1	germ cell-less protein-like 1	1.9	0.0001
GAZY01156182.1	G-protein coupled receptor 183-like	1.92	0
GAZY01170363.1	carnitine O-palmitoyltransferase 1, liver isoform-like	1.93	0.0003
GAZY01167885.1	CSC1-like protein 1	1.93	0.0009
GAZY01130136.1	jmjC domain-containing protein 8	1.93	0
GAZY01162594.1	lysophosphatidic acid phosphatase type 6	1.93	0.0042
GAZY01155833.1	MAGUK p55 subfamily member 7-like	1.94	0.0001
GAZY01169342.1	mitogen-activated protein kinase 6	1.95	0.0006
GAZY01136384.1	eukaryotic translation initiation factor 4E-1A	1.95	0.0015
GAZY01162088.1	putative RNA-directed DNA polymerase from transposon BS	1.96	0.0021
GAZY01157574.1	glutathione S-transferase C-terminal domain-containing protein	1.96	0.0029
GAZY01140213.1	protein phosphatase 1K, mitochondrial-like	1.97	0.0009
GAZY01154446.1	ras GTPase-activating protein-binding protein 1	1.97	0.0014
GAZY01177914.1	methionine--tRNA ligase, cytoplasmic isoform X2	1.97	0.0014
GAZY01151412.1	CAAX prenyl protease 1 homolog	1.97	0.005
GAZY01168191.1	ATP-dependent RNA helicase DDX39A	1.97	0.0001
GAZY01183477.1	sushi, von Willebrand factor type A, EGF and pentraxin domain-containing protein 1 isoform X1	1.97	0
GAZY01160148.1	kinesin-like protein KIF3C	1.98	0.001
GAZY01140682.1	nudix hydrolase 20, chloroplastic-like	1.98	0.0012
GAZY01175884.1	calpain-1 catalytic subunit-like	1.98	0
GAZY01091788.1	mannose-specific lectin-like	1.98	0.0008
GAZY01143746.1	bifunctional methylenetetrahydrofolate dehydrogenase/cyclohydrolase, mitochondrial-like	1.98	0.0001
GAZY01172950.1	solute carrier family 40 member 1	1.98	0.0002
GAZY01176459.1	superkiller viralicidic activity 2-like 2	2	0.0001
GAZY01179573.1	TOM1-like protein 2 isoform X2	2	0
GAZY01146554.1	palmitoyltransferase ZDHHC3-like isoform X1	2	0
GAZY01152214.1	AP-2 complex subunit mu isoform X2	2.01	0.0058
GAZY01143013.1	phosphoethanolamine/phosphocholine phosphatase isoform X1	2.01	0
GAZY01146520.1	acidic amino acid decarboxylase GADL1	2.03	0.0002
GAZY01160455.1	tyrosine-protein kinase Lyn-like	2.03	0.0002
GAZY01177302.1	gamma-taxilin-like	2.05	0
GAZY01126141.1	RWD domain-containing protein 4	2.05	0
GAZY01174687.1	disintegrin and metalloproteinase domain-containing protein 17	2.05	0.0061
GAZY01175912.1	tubulin--tyrosine ligase	2.05	0.0044
GAZY01149213.1	glutamate--cysteine ligase regulatory subunit	2.05	0.0004
GAZY01157490.1	elongation factor G, mitochondrial	2.06	0.0003
GAZY01172238.1	sterile alpha motif domain-containing protein 11 isoform X1	2.06	0.0005
GAZY01140595.1	immunoglobulin delta heavy chain	2.08	0.0035
GAZY01130094.1	immunoglobulin tau heavy chain	2.08	0.0007
GAZY01146808.1	G patch domain-containing protein 4	2.08	0.0005
GAZY01134286.1	C-type lectin domain family 4 member E-like	2.09	0.0016
GAZY01145906.1	protein FAM102B-like	2.09	0.0043
GAZY01154655.1	neutrophil cytosol factor 1	2.1	0.0002
GAZY01153090.1	EF-hand and coiled-coil domain-containing protein 1-like	2.1	0.0004
GAZY01128015.1	growth arrest and DNA damage-inducible protein GADD45 beta	2.1	0.0001
GAZY01152993.1	DNA replication licensing factor MCM5	2.11	0.002
GAZY01158697.1	Sua5 yciO yrdC domain containing protein	2.12	0.0036
GAZY01153000.1	group 3 secretory phospholipase A2-like	2.12	0.0018
GAZY01100857.1	proline-rich protein 15-like protein	2.13	0
GAZY01159662.1	protein C12orf4 homolog	2.13	0.0007
GAZY01127369.1	3-beta-hydroxysteroid-Delta(8),Delta(7)-isomerase	2.13	0.004
GAZY01152933.1	ubiquitin carboxyl-terminal hydrolase 14	2.14	0.0009
GAZY01129181.1	cytochrome c oxidase assembly factor 6 homolog	2.14	0.0033
GAZY01156809.1	serine/threonine-protein kinase pim-1-like	2.15	0
GAZY01130348.1	neutrophil cytosol factor 4	2.16	0.0055
GAZY01140676.1	beta-catenin-like protein 1	2.17	0.0005
GAZY01129322.1	phosphatidylserine decarboxylase proenzyme, mitochondrial isoform X1	2.17	0.002
GAZY01138435.1	lymphotoxin-alpha-like	2.18	0.0004
GAZY01159668.1	monocarboxylate transporter 1-like	2.18	0.0043
GAZY01177232.1	RING finger protein 223-like	2.2	0.0008
GAZY01117487.1	C-C motif chemokine 19-like	2.21	0.0004
GAZY01143773.1	probable gluconokinase	2.22	0.001
GAZY01138560.1	SAM domain-containing protein SAMSN-1-like	2.24	0.0019
GAZY01159436.1	tryptophan--tRNA ligase, cytoplasmic	2.25	0
GAZY01114072.1	hemoglobin subunit beta-A-like	2.28	0.0031
GAZY01171541.1	dehydrogenase/reductase SDR family member 1	2.31	0
GAZY01131650.1	protein FAM151B	2.31	0.0019
GAZY01128203.1	long-chain-fatty-acid--CoA ligase ACSBG2 isoform X1	2.32	0.005
GAZY01172480.1	cytoplasmic aconitate hydratase	2.32	0.0013
GAZY01159266.1	erythroferrone-like	2.34	0.0003
GAZY01154986.1	glucose-6-phosphate 1-dehydrogenase	2.34	0
GAZY01146074.1	MFS-type transporter SLC18B1	2.34	0.0014
GAZY01171065.1	electron transfer flavoprotein-ubiquinone oxidoreductase, mitochondrial	2.34	0
GAZY01170288.1	CDK5 regulatory subunit-associated protein 1	2.34	0.0003
GAZY01172287.1	barrier-to-autointegration factor	2.35	0
GAZY01139726.1	single-stranded DNA-binding protein, mitochondrial	2.35	0
GAZY01148916.1	DNA polymerase beta	2.36	0.0004
GAZY01142481.1	ribonucleoside-diphosphate reductase subunit M2	2.38	0
GAZY01153056.1	palmitoyltransferase ZDHHC3-like isoform X2	2.38	0.0017
GAZY01144703.1	proto-oncogene c-Fos-like	2.38	0.0005
GAZY01129476.1	HIG1 domain family member 1A, mitochondrial	2.38	0.0023
GAZY01148400.1	thimet oligopeptidase	2.39	0
GAZY01148464.1	UDP-glucuronosyltransferase 2B31-like isoform X2	2.39	0.0017
GAZY01138242.1	phospholipid hydroperoxide glutathione peroxidase, mitochondrial isoform X2	2.41	0
GAZY01157933.1	rho GDP-dissociation inhibitor 1	2.42	0
GAZY01127610.1	MHC class II antigen beta chain	2.43	0.0047
GAZY01178876.1	fatty acid desaturase 2	2.44	0
GAZY01137178.1	methyl-CpG-binding domain protein 2-like	2.45	0
GAZY01127928.1	complement C1q tumor necrosis factor-related protein 3-like	2.45	0.005
GAZY01132314.1	DNA damage-inducible transcript 4 protein	2.45	0.0035
GAZY01139331.1	pre-mRNA-processing factor 19	2.48	0.0042
GAZY01140262.1	P2Y purinoceptor 12-like	2.48	0.0006
GAZY01146901.1	UDP-glucose 6-dehydrogenase	2.49	0.0022
GAZY01138986.1	four and a half LIM domains protein 1 isoform X1	2.51	0
GAZY01135557.1	wee1-like protein kinase	2.52	0.0052
GAZY01175957.1	macrophage-stimulating protein receptor-like isoform X1	2.52	0.0005
GAZY01163361.1	peroxisomal membrane protein PMP34-like	2.53	0.0003
GAZY01133924.1	monoacylglycerol lipase ABHD6-like	2.53	0
GAZY01126070.1	fibrous sheath CABYR-binding protein-like	2.53	0
GAZY01160786.1	dipeptidyl peptidase 4-like	2.55	0.006
GAZY01139675.1	c-C chemokine receptor type 9-like	2.57	0
GAZY01148767.1	probable ATP-dependent RNA helicase DDX5 isoform X2	2.57	0.0049
GAZY01162541.1	early growth response protein 1	2.58	0.0002
GAZY01132742.1	protein GAPT-like	2.59	0.0041
GAZY01137654.1	basigin isoform X1	2.62	0.0019
GAZY01158776.1	P2Y purinoceptor 6	2.65	0
GAZY01136046.1	protein C19orf12 homolog	2.67	0.0008
GAZY01094059.1	hepcidin 2 variant 2	2.71	0.0002
GAZY01168104.1	eukaryotic translation initiation factor 4 gamma 2	2.75	0.0009
GAZY01123139.1	deoxycytidine kinase	2.75	0.0034
GAZY01140228.1	26S proteasome non-ATPase regulatory subunit 11B	2.76	0.0001
GAZY01138201.1	L-rhamnose-binding lectin SML-like	2.78	0.002
GAZY01167803.1	3-hydroxy-3-methylglutaryl-Coenzyme A reductase	2.81	0.0009
GAZY01134583.1	dual specificity protein phosphatase 5	2.84	0.0008
GAZY01147514.1	hepatocyte nuclear factor 3-beta-like	2.87	0
GAZY01121556.1	cytochrome c-b	2.89	0
GAZY01154613.1	serine/threonine-protein kinase Sgk1 isoform X2	2.89	0.0007
GAZY01128146.1	haptoglobin-like	2.9	0.0007
GAZY01160253.1	ERBB receptor feedback inhibitor 1-like	2.9	0
GAZY01137882.1	DNA primase small subunit	2.96	0
GAZY01137020.1	insulin-like growth factor-binding protein 3	2.98	0.0018
GAZY01183161.1	receptor-type tyrosine-protein phosphatase F isoform X1	3	0.003
GAZY01170843.1	low-density lipoprotein receptor-like	3.05	0
GAZY01130554.1	GTP-binding protein REM 1	3.06	0.0043
GAZY01142681.1	calcyphosin-like protein isoform X2	3.12	0
GAZY01135737.1	transcobalamin-2-like	3.18	0.0011
GAZY01160763.1	cytochrome P450 2K1-like	3.22	0
GAZY01112857.1	C-C motif chemokine 20-like	3.23	0
GAZY01165509.1	S-adenosylmethionine synthase	3.23	0.0008
GAZY01168471.1	lipase maturation factor 2	3.28	0.0003
GAZY01170342.1	glycerophosphodiester phosphodiesterase 1-like	3.3	0.002
GAZY01139629.1	fibroblast growth factor 23-like	3.31	0.0011
GAZY01165903.1	transcriptional regulator Myc-2-like	3.32	0
GAZY01148797.1	ceramide-1-phosphate transfer protein	3.37	0.0009
GAZY01139353.1	uncharacterized oxidoreductase YjmC-like	3.38	0.0052
GAZY01173103.1	glycerol kinase-like isoform X1	3.39	0
GAZY01129202.1	heme oxygenase 2-like	3.43	0.0001
GAZY01149312.1	endothelial lipase	3.43	0
GAZY01130803.1	arginase-1-like	3.45	0
GAZY01147761.1	major facilitator superfamily domain-containing protein 10	3.45	0
GAZY01140604.1	C-X-C chemokine receptor type 2-like	3.49	0
GAZY01182246.1	acetyl-CoA carboxylase 1 isoform X1	3.69	0.005
GAZY01138075.1	proline-rich transmembrane protein 1-like	3.75	0.0012
GAZY01168915.1	trafficking kinesin-binding protein 1-like	3.77	0
GAZY01115709.1	complement factor H-related protein 4-like	3.98	0
GAZY01140189.1	cytochrome P450 2G1-like	4.11	0
GAZY01140678.1	ADM2-like	4.2	0
GAZY01122857.1	olfactory marker protein	4.42	0
GAZY01094420.1	26S proteasome complex subunit DSS1	4.48	0.0001
GAZY01147356.1	dual specificity protein phosphatase 2-like	4.5	0.0039
GAZY01124596.1	myelin-oligodendrocyte glycoprotein-like isoform X1	4.57	0.0004
GAZY01181219.1	maltase-glucoamylase, intestinal-like	4.68	0.0031
GAZY01151708.1	angiopoietin-related protein 3-like	4.84	0
GAZY01156931.1	nucleoside diphosphate kinase 6	5.07	0.0012
GAZY01138171.1	solute carrier organic anion transporter family member 4A1	5.07	0.001
GAZY01172997.1	multidrug resistance-associated protein 9	5.28	0.0005
GAZY01125786.1	ADAMTS-like protein 1 isoform X1	5.51	0.004
GAZY01173159.1	ATP-citrate synthase	5.7	0.0057
GAZY01152729.1	inositol-3-phosphate synthase 1	6.12	0
GAZY01154213.1	transmembrane glycoprotein NMB isoform X2	6.2	0
GAZY01183100.1	receptor-type tyrosine-protein phosphatase F isoform X13	6.29	0
GAZY01183097.1	receptor-type tyrosine-protein phosphatase F isoform X15	6.5	0
GAZY01144770.1	cystatin-like 1	6.58	0.0009
GAZY01141024.1	retinol dehydrogenase 12	6.61	0
GAZY01157098.1	acyl-CoA desaturase-like	6.98	0.0001
GAZY01171715.1	gamma-interferon-inducible lysosomal thiol reductase-like	8.87	0
GAZY01154944.1	transmembrane glycoprotein NMB isoform X1	9.09	0
GAZY01123560.1	phytanoyl-CoA dioxygenase domain-containing protein 1-like	12.59	0.0023
GAZY01139728.1	6-phosphofructo-2-kinase/fructose-2,6-bisphosphatase 3 isoform X3	12.78	0.0014
GAZY01064200.1	claudin-15-like isoform X1	25.98	0.0056
GAZY01172175.1	matrix metalloproteinase-16-like isoform X1	44.81	0
